# Supplementary material
Source: Springer Nature journal article supplement (https://www.springermedizin.de/resource/supplementary/13550_2012_71_MOESM1_ESM.pdf/9687552)

**Supplementary Figure 1. Residual fraction in cold inserts of the NEMA NU 2-1994 phantom without scatter correction.** Results for the three non-emitting air (square), water (circle), and Teflon (triangle) inserts as a function of the number of iterations with eight subsets for the four SPECT-CT systems. (A) Philips Brightview XCT. (B) General Electric Discovery NM/CT 670. (C) General Electric Infinia Hawkeye 4. (D) Siemens Symbia T6. All are reconstructions with attenuation correction and resolution recovery.

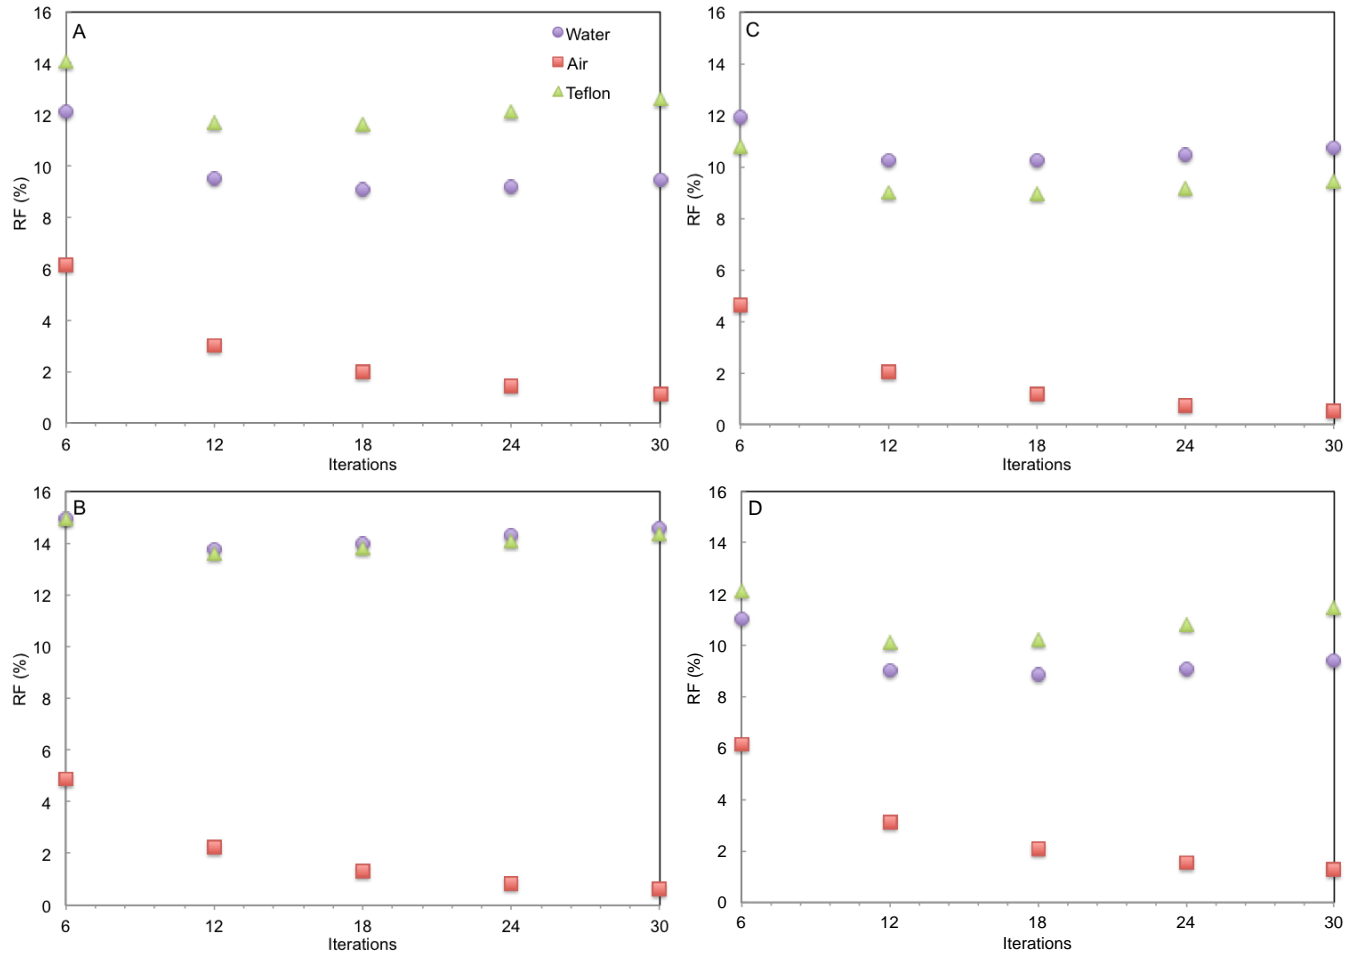

Supplement: MOESM1 [file 9687552]
